# Supplementary material
Source: PubMed Central journal article supplement (PMC7650529)
Supplement: NIHMS1642444-supplement-Supplement1.pdf [file NIHMS1642444-supplement-Supplement1.pdf]

## Supplementary Appendix

This appendix has been provided by the authors to give readers additional information about their work.

Supplement to: Sparks TN, Lianoglou BR, Adami RR, et al. Exome sequencing for prenatal diagnosis in non-immune hydrops fetalis. *N Engl J Med* 2020;383:1746-56. DOI: 10.1056/NEJMoa2023643

## Supplementary Appendix Table of Contents

|                                                                                                               |         |
|---------------------------------------------------------------------------------------------------------------|---------|
| List of Investigators.....                                                                                    | Page 2  |
| List of Contributors.....                                                                                     | Page 3  |
| Institutions and Providers that Referred or Supported Participants.....                                       | Page 5  |
| Table S1. Demographics, phenotypic features, and pregnancy outcomes by ES results...Page 7                    |         |
| Table S2. Full details of diagnostic variants, prenatal phenotypes, and pregnancy outcomes in NIHF cases..... | Page 10 |
| Table S3. Variants of uncertain significance in NIHF cases.....                                               | Page 20 |

## List of Investigators.

Teresa N. Sparks, MD, MAS;<sup>1</sup> Billie R. Lianoglou, MS;<sup>1</sup> Rebecca R. Adami, MD;<sup>2</sup> Iliana Datkhaeva, MD;<sup>3</sup> Kerry Holliman, MD;<sup>3</sup> Jennifer Duffy, MD;<sup>4</sup> Sarah L. Downum, BS;<sup>1</sup> Sachi Patel, BS;<sup>1</sup> Amanda Faubel, BS;<sup>1</sup> Nina M. Boe, MD;<sup>5</sup> Nancy T. Field, MD;<sup>5</sup> Aisling Murphy, MD;<sup>3</sup> Louise C. Laurent, MD, PhD;<sup>2</sup> Jennifer Jolley, MD;<sup>4</sup> Cherry Uy, MD;<sup>4</sup> Anne M. Slavotinek, MBBS, PhD;<sup>1</sup> Patrick Devine, MD, PhD;<sup>1</sup> Ugur Hodoglugil, MD, PhD;<sup>1</sup> Jessica Van Ziffle, PhD;<sup>1</sup> Stephan J. Sanders, BMBS, PhD;<sup>1</sup> Tippi C. MacKenzie, MD;<sup>1</sup> Mary E. Norton, MD<sup>1</sup> *on behalf of the University of California Fetal-Maternal Consortium (UCfC) and the UCSF Center for Maternal-Fetal Precision Medicine*

**List of Contributors.**

|                              |                                                                                                                                                                                                                                                                                                                                                                                                                                                                                              |
|------------------------------|----------------------------------------------------------------------------------------------------------------------------------------------------------------------------------------------------------------------------------------------------------------------------------------------------------------------------------------------------------------------------------------------------------------------------------------------------------------------------------------------|
| <p><b>UC Davis</b></p>       | <p>Nina Boe, Erin Brown, Diana Farmer, Nancy Field, Hedriana Herman, Shinjiro Hirose, Gina James, Elyse Love, Amelia McLennan, Francis Poulain, Amy Powne, Laila Rhee Morris, Catherine Rottkamp, Payam Saadai, Sherzana Sunderji, Veronique Tache, Jay Yeh</p>                                                                                                                                                                                                                              |
| <p><b>UC Irvine</b></p>      | <p>M Baraa Allaf, Katie Bacca, Lisa Carroll, Brian Crosland, Robert Day, Jennifer Duffy, David Gibbs, Afshan Hameed, Tamara Hatfield, Alexandra Iacob, Jennifer Jolley, Mustafa Kabeer, Nafiz Kiciman, Nancy Lee, Carol Major, Joshua Makhoul, Yona Nicolau, Manuel Porto, Rebecca Post, Lizette Spiers, Cherry Uy, Melissa Westermann, Peter Yu</p> <p><b>Children’s Hospital of Orange County:</b> Irfan Ahmad, Nita Doshi, Yigit Guner, Wyman Lai, Pierangelo Renella</p>                 |
| <p><b>UC Los Angeles</b></p> | <p>Yalda Afshar, Kara Calkins, Judith Chung, Iliina Datkhaeva, Daniel DeUgarte, Uday Devaskar, Jaime Deville, Viviana Fajardo, Meena Garg, Rachel Gutkin, Christina Han, Kerry Holliman, Carla Janzen, Howard Jen, Suhas Kallapur, Steven Lee, Steven Lerman, Melanie Maykin, Aisling Murphy, Tina Nguyen, Victoria Niklas, Naseem Rangwala, Rashmi Rao, Animesh Sabnis, Gary Satou, Emily Scibetta, Mark Sklansky, Rebecca Stark, Katie Strobel, Renea Sturm, Khalil Tabsh, Thalia Wong</p> |
| <p><b>UC San Diego</b></p>   | <p>Rebecca Adami, Tracy Anton, Jerasimos Ballas, Stephen Bickler, Erika Fernandez, Andrew Hull, Marni Jacobs, Diana Johnson, Karen Kling, Leah Lamale-Smith, Sarah Lazar, Louise Laurent, Dora Melber, Mana Parast, Mishella Perez, Dolores Pretorius, Sandy Ramos, Maryam Tarsa, Douglas Woelkers, Kathy Zhang-Rutledge</p> <p><b>Rady Children’s Hospital:</b> Kirsten Drummer, Ian Fraser Golding, Laurel Moyer, Heather Sun</p>                                                          |

|                                |                                                                                                                                                                                                                                                                                                                                                                                                                                                                                                                                                                                                                                                                                                                                                                                                                                                                                                                                                                                                                                                  |
|--------------------------------|--------------------------------------------------------------------------------------------------------------------------------------------------------------------------------------------------------------------------------------------------------------------------------------------------------------------------------------------------------------------------------------------------------------------------------------------------------------------------------------------------------------------------------------------------------------------------------------------------------------------------------------------------------------------------------------------------------------------------------------------------------------------------------------------------------------------------------------------------------------------------------------------------------------------------------------------------------------------------------------------------------------------------------------------------|
|                                |                                                                                                                                                                                                                                                                                                                                                                                                                                                                                                                                                                                                                                                                                                                                                                                                                                                                                                                                                                                                                                                  |
| <p><b>UC San Francisco</b></p> | <p>Kathryn Archbold, Victoria Berger, Paul Brakeman, Melissa Catenacci, Shilpa Chetty, Hillary Copp, Valerie Dougherty, Sarah Downum, Vickie Feldstein, Marla Ferschl, Neda Ghaffari, Ruth Goldstein, Juan Gonzalez-Velez, Veronica Gonzalez, Kristen Gosnell, Michael Harrison, Whitnee Hogan, Romobia Hutchinson, Roxanna Irani, Priyanka Jha, Roberta Keller, Katelin Kramer, Hanmin Lee, Billie Lianoglou, Jennifer Lucero, Tippi MacKenzie, Anne Mardy, Erin Matsuda, Edward Miller, Anita Moon-Grady, Tara Morgan, Amy Murtha, Mary Norton, Natalie Oman, Benjamin Padilla, Sachi Patel, Shabnam Peyandi, Andrew Phelps, Liina Poder, Annalisa Post, Larry Rand, Diana Robles, Frederico Rocha, Melissa Rosenstein, Janice Scudmore, Dorothy Shum, Nasim Sobhani, Teresa Sparks, Katherine Swanson, Martha Tesfalul, Stephanie Gaw, Lan Vu, Amanda Yeaton-Massey</p> <p><b>UCSF Benioff Children’s Hospital Oakland:</b> James Anderson, Lisa Arcilla, Victoria Berger, Erin Corbett, Erna Josiah-Davis, Leslie Lusk, Howard Rosenfeld</p> |

## **Institutions and Providers that Referred or Supported Participants.**

Akron Children's Hospital, OH (Katie Krepkovich); Allina Health, MN (Amber Volk, Dr. Caroline Leonard, Dr. Saul Snowise); Atrium Health, NC (Jean St. John); Benioff Children's Hospital Oakland (Dr. Victoria Berger, Holly Mueller); Brigham and Women's Hospital, MA (Dr. Kathryn Gray, Dr. Rosemary Reiss, Dr. Stephanie Guseh, Dr. Louise Wilkins-Haug, Dr. Yael Hoffman-Sage, Jody Foster, Sophie Adams); Capital Health (Dr. Karen Leedom); CentraCare, MN (Brooke Mainville, Joy Gustin); Children's Hospital of Philadelphia, PA (Dr. Christina Paidas Teefey, Dr. Sarah Sheppard, Erica Schindewolf, Lisa Pilchman, Natalie Burrill); Colorado Fetal Care Center, CO (Kestutis Micke); Columbia University Irving Medical Center, NY (Dr. Samsiya Ona, Dr. Ronald Wapner, Erica Speigel, Jessica Giordano); Eastern Virginia Medical School, VA (Dr. Kathleen Heim, Kristen Cornell); Fetal Diagnostic Center of Arizona, AZ (Karina Nall); Georgia Perinatal Consultants, GA (Dr. Carla Ransom, Dr. Rachel Shulman); Indiana University School of Medicine, IN (Dr. Melissa Lah); Integrated Genetics (Tara Short); Intermountain Healthcare, UT (Dr. Helen Feltovich, Lauren Eekoff); Johns Hopkins University (Cathleen Lawson, Chrissy Hertenstein, Dr. Angie Jelin, Katie Forster, Katie Sagaser); Kaiser Permanente (Dr. Emily Chen, Dr. Jeffery Sperling, Jamie Fisher, Sarah Whitmer, Vera Cherepakho); Mayo Clinic (Dr. Lisa Schimmenti, Dr. Myra Wick); Miami Valley Hospital/Premier Health, OH (Dr. Amanda Graf, Dr. Sarah Van Nostrand, Julia Coltri, Paul Hudson); Montefiore Medical Center (Emma Suskin, Dr. Sara Rabin-Havt, Dr. Susan Klugman); Mount Carmel Health System, OH (Dr. Jill Pluciniczak, Dr. Tondra Newman, Megan Knapke); New Hanover Regional Medical Center, NC (Dr. Madhur Mittal); NorthShore University Health System, IL (Leslie Geibel); Northwest Perinatal Center, OR (Karen Hansen); Novant Health, NC (Dr. Amelia Sutton); Oregon Health and Science University, OR (Dr. Brian Shaffer); Orlando Health, FL (Kimberly Skellington); Palo Alto Medical Foundation, CA (Dr. Kathy Salari, Dr. Per Sandberg, Kelly Miller, Mayya Sakr); Scripps Health, CA (Caitlin Campbell, Sara Fernandes), Sharp Healthcare, CA

(Dr. Caroline Dustin); Stanford Medicine, CA (Dr. Heather Byers, Jane Chinn, Rojan Kavosh); Sutter Health, CA (Dr. Tatiana Goldstein, Heather Lewis, Meghan Dunne); Swedish Medical Center, WA (Cherise Klotz); University of Alabama Medical Center, AL (Dr. Jegen Kandasamy, Dr. Vivek Shukla, Heather Austin); University of California, San Francisco, Fresno campus, CA (Dr. Cynthia Curry); University of Michigan, MI (Jacqueline Isaac); University of Pennsylvania, PA (Dr. Lorraine Dugoff, Kristen Presser, Natalia Wisniewski, Rose Giardine, Stacy Shoup); University of California, Davis (Courtney Overstreet, Dr. Catherine Rottkamp); University of California, Fresno (Dr. Cynthia Curry); University of California, Irvine (Lizette Spiers); University of California, Los Angeles, CA (Naseem Rangwala); University of California, San Diego, CA (Celestine Magallanes, Dr. Dora Melber, Tzu Liu); University of California, San Francisco, CA (Dr. Anne Mardy, Dr. Juan Gonzalez-Velez, Dr. Shilpa Chetty, Frannie Roche, Jessica Amezcua, Julia Silver, Rachel Farrell, Sarah Russell); University of Southern California, CA (Arlyn Llanes, Dr. Ramen Chmait, Kristine Rallo); University of Utah, UT (Dr. Lauren Theilen, Dr. Michelle Debbink, Dr. Nathan Blue, Dr. Robert Silver); University of Washington, WA (Elizabeth Coale); Valley Children's Healthcare, CA (Chloe Dugger, Jason Carmichael); West Virginia University Medicine, WV (Megan Yoho).

**Table S1. Demographics, phenotypic features, and pregnancy outcomes by ES results.**

| <b>Demographic</b>                                        | <b>Cases with diagnostic variants<br/>(N=37)</b> | <b>Cases without diagnostic variants<br/>(N=90)</b> |
|-----------------------------------------------------------|--------------------------------------------------|-----------------------------------------------------|
| Median maternal age (IQR) - years                         | 34 (30-36)                                       | 31 (28-35)                                          |
| Nulliparous – no. (%)                                     | 19 (51.4%)                                       | 38 (42.2%)                                          |
| Assisted reproductive technology – no. (%) *              | 1 (2.7%)                                         | 11 (12.2%)                                          |
| Median GA at diagnosis of NIHF (IQR) - weeks              | 18.7 (13.3-24.5)                                 | 20.6 (14.0-24.6)                                    |
| Prior pregnancy with NIHF – no. (%)                       | 3 (8.1%)                                         | 7 (7.8%)                                            |
| Biological parents consanguineous – no. (%)               | 0 (0.0%)                                         | 4 (4.4%)                                            |
| <b>Prenatal phenotype at enrollment †</b>                 |                                                  |                                                     |
| Increased NT or cystic hygroma – no. (%)                  | 9 (24.3%)                                        | 20 (22.2%)                                          |
| Isolated increased NT or cystic hygroma – no. (%)         | 1 (2.7%)                                         | 14 (15.6%)                                          |
| Concurrent structural anomaly – no. (%)                   | 6 (16.2%)                                        | 3 (3.3%)                                            |
| >1 additional abnormal fluid collection – no. (%)         | 2 (5.4%)                                         | 3 (3.3%)                                            |
| Single abnormal fetal fluid collection – no. (%)          | 2 (5.4%)                                         | 19 (21.1%)                                          |
| Isolated single abnormal fetal fluid collection – no. (%) | 0 (0.0%)                                         | 4 (4.4%)                                            |
| Concurrent structural anomaly – no. (%)                   | 2 (5.4%)                                         | 15 (16.7%)                                          |
| ≥2 abnormal fetal fluid collections – no. (%)             | 26 (70.3%)                                       | 51 (56.7%)                                          |



|                                                     |            |            |
|-----------------------------------------------------|------------|------------|
| Isolated abnormal fetal fluid collections – no. (%) | 13 (35.1%) | 26 (28.9%) |
| Concurrent structural anomaly – no. (%)             | 13 (35.1%) | 25 (27.8%) |
| <b>Fetal sex</b>                                    |            |            |
| Female – no. (%)                                    | 20 (54.1%) | 45 (50.0%) |
| Male – no. (%)                                      | 17 (46.0%) | 45 (50.0%) |
| <b>Maternal race</b>                                |            |            |
| White – no. (%)                                     | 22 (59.5%) | 52 (57.8%) |
| Asian – no. (%)                                     | 6 (16.2%)  | 13 (14.4%) |
| Mixed – no. (%)                                     | 4 (10.8%)  | 14 (15.6%) |
| Latina – no. (%)                                    | 4 (10.8%)  | 8 (8.9%)   |
| Black – no. (%)                                     | 1 (2.7%)   | 2 (2.2%)   |
| Unknown – no. (%)                                   | 0 (0.0%)   | 1 (1.1%)   |
| <b>Region of United States</b>                      |            |            |
| West – no. (%)                                      | 24 (64.9%) | 62 (68.9%) |
| Midwest – no. (%)                                   | 4 (10.8%)  | 9 (10.0%)  |
| South – no. (%)                                     | 3 (8.1%)   | 5 (5.6%)   |
| Northeast – no. (%)                                 | 6 (16.2%)  | 14 (15.6%) |
| <b>Pregnancy outcome</b>                            |            |            |
| Ongoing pregnancy – no. (%)                         | 3 (8.1%)   | 20 (22.2%) |
| Live infant – no. (%)                               | 5 (13.5%)  | 13 (14.4%) |

|                                                |                  |                  |
|------------------------------------------------|------------------|------------------|
| Postnatal death – no. (%)                      | 7 (18.9%)        | 19 (21.1%)       |
| Stillbirth – no. (%) ‡                         | 4 (10.8%)        | 11 (12.2%)       |
| Pregnancy termination – no. (%)                | 15 (40.5%)       | 20 (22.2%)       |
| Selective reduction of affected twin – no. (%) | 0 (0.0%)         | 3 (3.3%)         |
| Spontaneous loss – no. (%) §                   | 3 (8.1%)         | 4 (4.4%)         |
| Median GA at delivery (IQR) - weeks ¶          | 30.9 (29.7-32.0) | 32.1 (27.0-34.3) |

\* 11 pregnancies resulted from in vitro fertilization and 1 from intrauterine insemination.

† Prenatal phenotype at enrollment in study and completion of ES.

‡ Intrauterine fetal demise at ≥20 weeks.

§ Spontaneous pregnancy loss prior to 20 weeks.

¶ Among ongoing pregnancies that did not result in spontaneous loss, termination, or stillbirth.

ES, exome sequencing. GA, gestational age. IQR, interquartile range. NIHF, non-immune hydrops fetalis. NT, nuchal translucency.

**Table S2. Full details of diagnostic variants, prenatal phenotypes, and pregnancy outcomes in NIHF cases.**

| Case               | Gene   | Genetic disorder | Genomic coordinates | Reference/Alternate * | Transcript ID | Coding alteration | Protein alteration | Variant type | Zygoty       | Novel or reported † | Full prenatal phenotype                                                                                                                                              | Pregnancy outcome |
|--------------------|--------|------------------|---------------------|-----------------------|---------------|-------------------|--------------------|--------------|--------------|---------------------|----------------------------------------------------------------------------------------------------------------------------------------------------------------------|-------------------|
| <i>RASopathies</i> |        |                  |                     |                       |               |                   |                    |              |              |                     |                                                                                                                                                                      |                   |
| H025               | PTPN11 | Noonan syndrome  | 12:112,888,198      | G/C                   | NM_002834.3   | c.214G>C          | p.Ala72Pro         | Missense     | Heterozygous | Reported            | CH, pleural effusions, skin edema, suspected aortic coarctation                                                                                                      | Stillbirth        |
| H089               | PTPN11 | Noonan syndrome  | 12:112,915,523      | A/G                   | NM_002834.3   | c.922A>G          | p.Asn308Asp        | Missense     | Heterozygous | Reported            | Pleural effusions, ascites, skin edema, mild ventriculomegaly, polyhydramnios                                                                                        | Neonatal death    |
| H086               | PTPN11 | Noonan syndrome  | 12:112,915,455      | T/C                   | NM_002834.3   | c.854T>C          | p.Phe285Ser        | Missense     | Heterozygous | Reported            | Pleural effusions, skin edema, mild ventriculomegaly, suspected aortic coarctation, biventricular hypertrophy, absent DV, hepatomegaly, pelviectasis, polyhydramnios | Neonatal death    |

|      |        |                                         |                |     |             |          |             |          |              |          |                                                                                                            |                |
|------|--------|-----------------------------------------|----------------|-----|-------------|----------|-------------|----------|--------------|----------|------------------------------------------------------------------------------------------------------------|----------------|
| H095 | PTPN11 | Noonan syndrome                         | 12:112,915,455 | T/C | NM_002834.3 | c.854T>C | p.Phe285Ser | Missense | Heterozygous | Reported | Pleural effusions, ascites, skin edema, short long bones, placentomegaly                                   | Stillbirth     |
| H036 | KRAS   | Noonan syndrome                         | 12:25,380,238  | T/G | NM_033360.2 | c.220A>C | p.Thr74Pro  | Missense | Heterozygous | Novel    | Pleural effusions, ascites, skin edema, VSD, left SVC draining into coronary sinus, SUA, polyhydramnios    | Stillbirth     |
| H042 | RIT1   | Noonan syndrome                         | 1:155,874,285  | A/C | NM_006912.5 | c.246T>G | p.Phe82Leu  | Missense | Heterozygous | Reported | Pleural effusions, ascites, skin edema, polyhydramnios                                                     | Neonatal death |
| H073 | SHOC2  | Noonan syndrome-like, loose anagen hair | 10:112,724,635 | G/A | NM_007373.3 | c.519G>A | p.Met173Ile | Missense | Heterozygous | Reported | Pleural effusions, ascites, skin edema, placentomegaly                                                     | Stillbirth     |
| H008 | HRAS   | Costello syndrome                       | 11:534,289     | C/T | NM_176795.3 | c.34G>A  | p.Gly12Ser  | Missense | Heterozygous | Reported | Diffuse scalp edema, clenched hands, arrhythmia, very large abdomen, absent stomach, severe polyhydramnios | Living infant  |
| H016 | HRAS   | Costello syndrome                       | 11:534,286     | C/G | NM_176795.3 | c.37G>C  | p.Gly13Arg  | Missense | Heterozygous | Novel    | CH, pleural effusion, pericardial effusion,                                                                | Stillbirth     |

|                                           |      |                                       |                                |            |                            |                        |                             |                      |                          |                   |                                                                                                                                                                                              |                          |
|-------------------------------------------|------|---------------------------------------|--------------------------------|------------|----------------------------|------------------------|-----------------------------|----------------------|--------------------------|-------------------|----------------------------------------------------------------------------------------------------------------------------------------------------------------------------------------------|--------------------------|
|                                           |      |                                       |                                |            |                            |                        |                             |                      |                          |                   | ascites, skin edema,<br>intraabdominal<br>calcification                                                                                                                                      |                          |
| H119                                      | HRAS | Costello<br>syndrome                  | 11:534,288                     | C/T        | NM_176795.3                | c.35G>A                | p.Gly12Asp                  | Missense             | Heterozygous             | Reported          | CH, levorotated heart,<br>small stomach,<br>abnormal posturing of<br>extremities, large<br>abdomen with<br>hepatomegaly,<br>possible<br>demineralization in<br>some bones,<br>polyhydramnios | Pregnancy<br>termination |
| H020                                      | BRAF | Cardiofacio-<br>cutaneous<br>syndrome | 7:140,453,987                  | T/G        | NM_004333.4                | c.1741A>C              | p.Asn581His                 | Missense             | Heterozygous             | Reported          | CH, pleural effusion,<br>pericardial effusion,<br>skin edema, absent<br>CSP, cardiomegaly,<br>hepatomegaly,<br>clubbed feet,<br>placentomegaly                                               | Stillbirth               |
| <b><i>Inborn errors of metabolism</i></b> |      |                                       |                                |            |                            |                        |                             |                      |                          |                   |                                                                                                                                                                                              |                          |
| H005                                      | NPC1 | Niemann<br>Pick C<br>disease          | 18:21,116,700<br>18:21,124,366 | A/G<br>G/T | NM_000271.4<br>NM_000271.4 | c.3182T>C<br>c.2072C>A | p.Ile1061Thr<br>p.Pro691Gln | Missense<br>Missense | Compound<br>heterozygous | Reported<br>Novel | Pericardial effusion,<br>ascites, scalp edema,<br>biventricular                                                                                                                              | Neonatal<br>death        |

|                                            |       |                                         |                                |            |                            |                                                                    |                    |                         |                          |                   |                                                                                                                                                      |                          |
|--------------------------------------------|-------|-----------------------------------------|--------------------------------|------------|----------------------------|--------------------------------------------------------------------|--------------------|-------------------------|--------------------------|-------------------|------------------------------------------------------------------------------------------------------------------------------------------------------|--------------------------|
|                                            |       |                                         |                                |            |                            |                                                                    |                    |                         |                          |                   | hypertrophy,<br>placentomegaly                                                                                                                       |                          |
| H019                                       | GLB1  | GM1<br>gangliosido<br>sis               | 3:33,093,274<br>3:33,138,501   | C/T<br>C/- | NM_000404.2<br>NM_000404.2 | c.931G>A<br>c.75+1delG                                             | p.Gly311Arg<br>--- | Missense<br>Splice site | Compound<br>heterozygous | Reported<br>Novel | Thick NF, ascites,<br>scalp edema, VSD,<br>pelvic kidney, SUA                                                                                        | Pregnancy<br>termination |
| H054                                       | GUSB  | Mucopoly-<br>saccharidos<br>is type VII | 7:65,447,136<br>7:65,446,960   | A/G<br>C/T | NM_000181.3<br>NM_000181.3 | c.35T>C<br>c.210+1G>A                                              | p.Leu12Pro<br>---  | Missense<br>Splice site | Compound<br>heterozygous | Novel<br>Novel    | Thick NF, pleural<br>effusions, pericardial<br>effusion, ascites, skin<br>edema, unilateral<br>MCDK,<br>oligohydramnios                              | Stillbirth               |
| H068                                       | GUSB  | Mucopoly-<br>saccharidos<br>is type VII | chr7:65,435,09<br>5-65,435,534 | ---        | ---                        | Homozygous<br>exon 9 deletions<br>(chr7:65,435,095<br>-65,435,534) | ---                | Deletions               | Homozygous               | Novel             | Pericardial effusion,<br>ascites, skin edema,<br>oligohydramnios                                                                                     | Living infant            |
| <b>Primarily musculoskeletal disorders</b> |       |                                         |                                |            |                            |                                                                    |                    |                         |                          |                   |                                                                                                                                                      |                          |
| H026                                       | MYH3  | Multiple<br>pterygium<br>syndrome       | 17:10,544,453                  | A/G        | NM_002470.3                | c.2114T>C                                                          | p.Ile705Thr        | Missense                | Heterozygous             | Novel             | Pleural effusions, skin<br>edema, absent CSP,<br>absent stomach, short<br>long bones, scoliosis,<br>abnormal vertebrae,<br>clubbed hands and<br>feet | Stillbirth               |
| H034                                       | FGFR3 | Thanatopho<br>ric                       | 4:1,803,564                    | C/T        | NM_0011632<br>13.1         | c.742C>T                                                           | p.Arg248Cys        | Missense                | Heterozygous             | Reported          | CH, Dandy Walker<br>malformation, absent                                                                                                             | Pregnancy<br>termination |

|                                               |        |                                                 |                                |                 |                                          |                             |                                       |                        |                          |                |  |                                                                                                          |                          |
|-----------------------------------------------|--------|-------------------------------------------------|--------------------------------|-----------------|------------------------------------------|-----------------------------|---------------------------------------|------------------------|--------------------------|----------------|--|----------------------------------------------------------------------------------------------------------|--------------------------|
|                                               |        | dysplasia<br>type I                             |                                |                 |                                          |                             |                                       |                        |                          |                |  | nasal bone, aberrant<br>right subclavian<br>artery, short long<br>bones                                  |                          |
| H055                                          | KLHL40 | Nemaline<br>myopathy                            | 3:42,730,455                   | A/C             | NM_152393.3                              | Homozygous<br>c.1516A>C     | Homozygous<br>p.Thr506Pro             | Missense               | Homozygous               | Reported       |  | Pleural effusions,<br>pericardial effusion,<br>ascites, skin edema,<br>clenched hands,<br>polyhydramnios | Stillbirth               |
| H085                                          | SF3B4  | Nager<br>syndrome<br>(acrofacial<br>dysostosis) | 1:149,899,650                  | A/G             | NM_005850.4                              | c.2T>C                      | p.Met1?                               | Start loss             | Heterozygous             | Novel          |  | CH, micrognathia,<br>mesomelia, abnormal<br>positioning of<br>extremities                                | Pregnancy<br>termination |
| <b>Lymphedema disorders</b>                   |        |                                                 |                                |                 |                                          |                             |                                       |                        |                          |                |  |                                                                                                          |                          |
| H044                                          | FOXC2  | Lympe-<br>dema-<br>distichiasis                 | 16:86,601,968                  | G/T             | NM_005251.2                              | c.1027G>T                   | p.Glu343*                             | Nonsense               | Heterozygous             | Novel          |  | CH, abnormal kidneys                                                                                     | Pregnancy<br>termination |
| H050                                          | FLT4   | Milroy<br>disease                               | 5:180,043,465                  | G/A             | NM_182925.5                              | c.3121C>T                   | p.Arg1041Trp                          | Missense               | Heterozygous             | Reported       |  | Pleural effusions,<br>ascites, skin edema                                                                | Living infant            |
| H072                                          | PIEZO1 | Generalized<br>lymphatic<br>dysplasia           | 16:88,787,086<br>16:88,783,084 | 23bp del<br>A/G | NM_0011428<br>64.2<br>NM_0011428<br>64.2 | c.5716_5738del<br>c.6809T>C | p.Pro1906Lysfs<br>*55<br>p.Ile2270Thr | Frameshift<br>Missense | Compound<br>heterozygous | Novel<br>Novel |  | Pleural effusions, skin<br>edema,<br>polyhydramnios                                                      | Neonatal<br>death        |
| <b>Primarily neurodevelopmental disorders</b> |        |                                                 |                                |                 |                                          |                             |                                       |                        |                          |                |  |                                                                                                          |                          |

|                                           |        |                                         |                                |             |                            |                            |                              |                         |                                         |                |                                                                                                                                                                         |                       |
|-------------------------------------------|--------|-----------------------------------------|--------------------------------|-------------|----------------------------|----------------------------|------------------------------|-------------------------|-----------------------------------------|----------------|-------------------------------------------------------------------------------------------------------------------------------------------------------------------------|-----------------------|
| H018                                      | WAC    | Desanto-Shinawi syndrome                | 10:28,903,527                  | G/-         | NM_016628.4                | c.1335delG                 | p.Ser491fs*9                 | Frameshift              | Heterozygous                            | Novel          | CH, two VSDs, severe aortic coarctation                                                                                                                                 | Pregnancy termination |
| H063                                      | ZEB2   | Mowat-Wilson syndrome                   | 2:145,156,671                  | G/A         | NM_014795.3                | c.2083C>T                  | p.Arg695*                    | Nonsense                | Heterozygous                            | Reported       | CH, scalp edema                                                                                                                                                         | Stillbirth            |
| H083                                      | DHCR24 | Desmosterolosis                         | 1:55,319,709<br>1:55,319,724   | C/T<br>G/A  | NM_014762.3<br>NM_014762.3 | c.1218+1G>A<br>c.1204C>T   | ---<br>p.Gln402*             | Splice site<br>Nonsense | Compound heterozygous                   | Novel<br>Novel | CH, skin edema, abnormal skull shape, abnormal extremity positioning, contractures                                                                                      | Pregnancy termination |
| <b>Primarily cardiovascular disorders</b> |        |                                         |                                |             |                            |                            |                              |                         |                                         |                |                                                                                                                                                                         |                       |
| H007                                      | ACAD9  | Mitochondrial complex I deficiency      | 3:128,623,307<br>3:128,618,292 | C/-<br>C/T  | NM_014049.5<br>NM_014049.5 | c.1109delC<br>c.796C>T     | p.Pro370fs*13<br>p.Arg266Trp | Frameshift<br>Missense  | Compound heterozygous                   | Novel<br>Novel | Pericardial effusion, ascites, cardiomegaly, short long bones, small thorax                                                                                             | Neonatal death        |
| H058                                      | NEXN   | Dilated and hypertrophic cardiomyopathy | 1:78,392,255<br>1:78,407,837   | C/T<br>AA/- | NM_144573.3<br>NM_144573.3 | c.646C>T<br>c.1606_1607del | p.Arg216*<br>p.Lys536fs      | Nonsense,<br>Frameshift | Heterozygous or compound heterozygous ‡ | Novel<br>Novel | Pericardial effusion, ascites, cardiomegaly, dilation and hypertrophy of cardiac ventricles, hypoplastic and dysplastic aortic valve, diminished systolic function, FGR | Stillbirth            |



|                                        |        |                                      |               |      |                    |                |               |            |              |          |                                                                                                                                                                        |                       |
|----------------------------------------|--------|--------------------------------------|---------------|------|--------------------|----------------|---------------|------------|--------------|----------|------------------------------------------------------------------------------------------------------------------------------------------------------------------------|-----------------------|
| H080                                   | MYRF   | Cardiac-urogenital syndrome          | 11:61,539,012 | -/C  | NM_0011273<br>92.1 | c.789dupC      | p.Ser264fs    | Frameshift | Heterozygous | Reported | Pleural effusions, pericardial effusion, ascites, small bilateral jugular sacs, AV canal defect, small aorta, possible persistent left SVC, heterotaxy, umbilical cyst | Pregnancy termination |
| <i>Primarily hematologic disorders</i> |        |                                      |               |      |                    |                |               |            |              |          |                                                                                                                                                                        |                       |
| H027                                   | RPL11  | Diamond Blackfan anemia              | 1:24,021,197  | TT/- | NM_0011998<br>02.1 | c.314_315delTT | p.Phe105fs*15 | Frameshift | Heterozygous | Novel    | CH, thick NF, pericardial effusion, skin edema, single UA, elevated MCA Dopplers                                                                                       | Living infant         |
| H094                                   | PIEZO1 | Dehydrated hereditary stomatocytosis | 16:88,799,740 | C/T  | NM_0011428<br>64.2 | c.2610G>A      | p.Met870Ile   | Missense   | Heterozygous | Reported | Pleural effusions, ascites, skin edema, scalloping of frontal skull, polyhydramnios, normal MCA Dopplers                                                               | Living infant         |
| H126                                   | PIEZO1 | Dehydrated hereditary stomatocytosis | 16:88,801,339 | C/T  | NM_0011428<br>64.2 | c.1792G>A      | p.Val598Met   | Missense   | Heterozygous | Reported | CH, pleural effusions, pericardial effusion, ascites, skin edema, hypoplastic nasal bone, brachycephaly,                                                               | Ongoing pregnancy     |

|                                        |       |                                                                                        |               |     |             |            |             |                      |              |          |                                                                                                 |                       |
|----------------------------------------|-------|----------------------------------------------------------------------------------------|---------------|-----|-------------|------------|-------------|----------------------|--------------|----------|-------------------------------------------------------------------------------------------------|-----------------------|
|                                        |       |                                                                                        |               |     |             |            |             |                      |              |          | SUA, elevated MCA Dopplers, spherocytes in fetal blood                                          |                       |
| <b>Primarily immunologic disorders</b> |       |                                                                                        |               |     |             |            |             |                      |              |          |                                                                                                 |                       |
| H056                                   | STAT3 | Hyper-IgE recurrent infection syndrome, multisystem infantile-onset autoimmune disease | 17:40,485,718 | G/A | NM_213662.1 | c.1022C>T  | p.Thr341Ile | Missense             | Heterozygous | Reported | Pleural effusions, ascites                                                                      | Pregnancy termination |
| H113                                   | FOXP3 | Immuno-dysregulation, polyendocrinopathy, and enteropathy, X-linked (IPEX syndrome)    | X:49,112,265  | C/T | NM_014009.3 | c.543-2A>G | ---         | Splice site acceptor | X-linked     | Novel    | Pleural effusions, pericardial effusion, ascites, skin edema, absent stomach, clubbed feet, SUA | Pregnancy termination |
| <b>Primarily renal disorders</b>       |       |                                                                                        |               |     |             |            |             |                      |              |          |                                                                                                 |                       |

|                             |       |                                                                                                   |                                |            |                                          |                          |                            |                      |                       |                |                                                                                                                                           |                       |
|-----------------------------|-------|---------------------------------------------------------------------------------------------------|--------------------------------|------------|------------------------------------------|--------------------------|----------------------------|----------------------|-----------------------|----------------|-------------------------------------------------------------------------------------------------------------------------------------------|-----------------------|
| H107                        | CEP55 | Multinucleated neurons, anhydramnios, renal dysplasia, cerebellar hypoplasia, and hydranencephaly | 10:95,262,876<br>10:95,287,888 | C/T<br>A/G | NM_0011271<br>82.1<br>NM_0011271<br>82.1 | c.190C>T<br>c.1373A>G    | p.Arg64*<br>p.His458Arg    | Nonsense<br>Missense | Compound heterozygous | Novel<br>Novel | CH, skin edema, hydrocephaly, VSD, overriding aorta, kidneys not visualized, arthrogryposis, clubbed feet, FGR, low normal amniotic fluid | Stillbirth            |
| <b>Ciliopathies</b>         |       |                                                                                                   |                                |            |                                          |                          |                            |                      |                       |                |                                                                                                                                           |                       |
| H030                        | DNAH9 | Primary ciliary dyskinesia                                                                        | 17:11,572,741                  | G/-        | NM_001372.3                              | Homozygous<br>c.2984delG | Homozygous<br>p.Arg995fs*5 | Frameshift           | Homozygous            | Novel          | Ascites, skin edema, left atrial isomerism, ventricular non-compaction, AV canal defect, arrhythmia, polyhydramnios                       | Neonatal death        |
| <b>Overgrowth disorders</b> |       |                                                                                                   |                                |            |                                          |                          |                            |                      |                       |                |                                                                                                                                           |                       |
| H109                        | SUZ12 | Imagawa-Matsumoto syndrome                                                                        | 17:30,321,594                  | G/-        | NM_015355.2                              | c.1451delG               | p.Gly484fs                 | Frameshift           | Heterozygous          | Novel          | Thick NF, pleural effusion, skin edema, suspected pulmonary lymphangiectasia                                                              | Ongoing pregnancy     |
| <b>Other disorders</b>      |       |                                                                                                   |                                |            |                                          |                          |                            |                      |                       |                |                                                                                                                                           |                       |
| H124                        | CHD7  | CHARGE syndrome                                                                                   | 8:61,741,262                   | TG/-       | NM_017780.3                              | c.3422_3423del<br>TG     | p.Val1141fs                | Frameshift           | Heterozygous          | Novel          | Increased NT (4.5 mm)                                                                                                                     | Pregnancy termination |

\* Reference nucleotide in the genome/alternate nucleotide seen in the proband (fetus or neonate).

† Previously reported is noted if the variant has been documented in ClinVar or the literature in prenatal or postnatal cases.

‡ Two *NEXN* variants were identified, one of maternal inheritance and the other de novo, for which cis versus trans phase could not be definitively determined due to the distance at which these variants were spaced from each other.

AV, atrioventricular. CH, cystic hygroma. CSP, cavum septum pellucidum. DV, ductus venosus. FGR, fetal growth restriction. MCA, middle cerebral artery. MCDK, multicystic dysplastic kidney. NT, nuchal translucency. NF, nuchal fold. NIHF, non-immune hydrops fetalis. NT, nuchal translucency. SUA, single umbilical artery. SVC, superior vena cava. VSD, ventricular septal defect.

**Table S3. Variants of uncertain significance in NIHF cases.**

| Case                                       | Gene    | Genetic disorder                                                                 | Protein alteration           | Inheritance                       |
|--------------------------------------------|---------|----------------------------------------------------------------------------------|------------------------------|-----------------------------------|
| <b><i>Neurodevelopmental disorders</i></b> |         |                                                                                  |                              |                                   |
| H021                                       | POU3F3  | Developmental delay                                                              | p.His180Pro                  | Suspected parental mosaicism (AD) |
| H032                                       | KMT2D   | Kabuki syndrome                                                                  | p.Ala4568Pro                 | Paternal (AD)                     |
| H070                                       | DYNC1H1 | Spinal muscular atrophy, lower extremity predominant; neuronal migration defects | p.Arg2091Trp                 | De novo or paternal (duo, AD)     |
| H075                                       | FBXW11  | FBXW11-related neurodevelopmental, digital, jaw, and eye anomalies               | p.Arg98*                     | De novo or paternal (duo, AD)     |
| H099                                       | ERCC5   | Cerebrooculofacioskeletal syndrome                                               | p.Asp730Gly                  | Maternal and paternal (AR)        |
| H106                                       | EP300   | Rubenstein-Taybi syndrome                                                        | p.Ser111Asn                  | De novo (AD)                      |
| H120                                       | WDFY3   | Primary microcephaly                                                             | p.Phe2825Cys                 | De novo (AD)                      |
| <b><i>Lymphedema disorders</i></b>         |         |                                                                                  |                              |                                   |
| H088                                       | PIEZO1  | Generalized lymphatic dysplasia                                                  | p.Arg2336Trp<br>p.Phe1247Cys | Maternal and paternal (AR)        |
| H096                                       | FLT4    | Milroy disease                                                                   | p.Ser1275Gly                 | De novo (AD)                      |
| <b><i>RASopathies</i></b>                  |         |                                                                                  |                              |                                   |
| H118                                       | LZTR1   | Noonan syndrome                                                                  | p.Arg412Cys                  | Maternal (AD)                     |
| <b><i>Hematologic disorders</i></b>        |         |                                                                                  |                              |                                   |
| H035                                       | GATA1   | Anemia with or without neutropenia and with or without platelet abnormality      | p.Pro385Leu                  | Maternal (AD)                     |
| <b><i>Other disorders</i></b>              |         |                                                                                  |                              |                                   |
| H009                                       | LRP6    | Tooth agenesis, coronary artery disease                                          | p.Tyr373Cys                  | Maternal (AD)                     |

AD, autosomal dominant. AR, autosomal recessive. NIHF, non-immune hydrops fetalis.
